# Supplementary material
Source: PubMed Central journal article supplement (PMC3776632)
Supplement: mt2013143x1.pdf [file mt2013143x1.pdf]

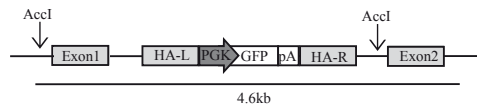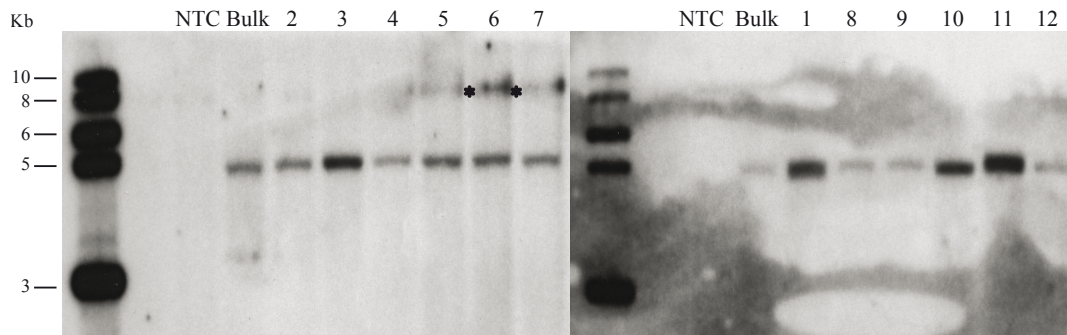

**Supplementary figure 1.** Southern blot analysis of genomic DNA extracted from HaCaT cell clones, digested with *AccI* that encompasses the AVVS1 target locus, and hybridized to a green fluorescent protein (GFP) probe. The expected band, corresponding to 4.6 kb indicates the presence of a GFP expression cassette correctly integrated into the target locus. Clones showing rearrangements or off-target integrations are highlighted by a black asterisks. The positions of restriction sites used for analysis are indicated. NTC: non treated cells. Molecular weight marker is indicated on the left.

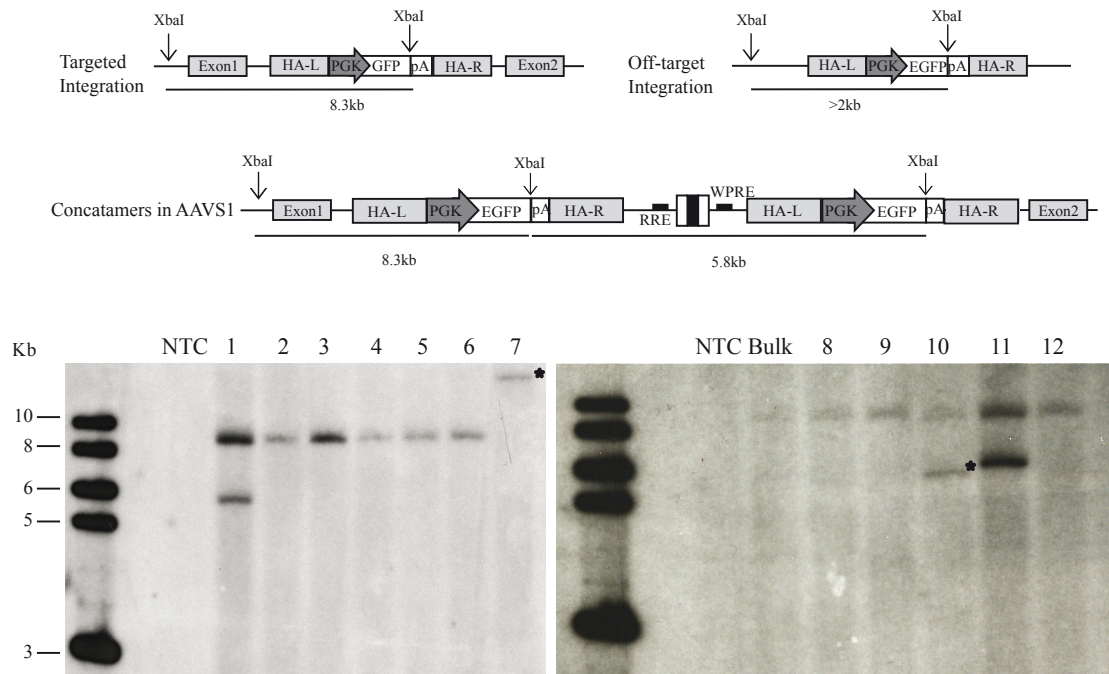

**Supplementary figure 2.** Southern blot analysis of genomic DNA from HaCaT cell clones, digested with *XbaI* single cutter in the donor cassette and hybridized to a GFP probe. A band corresponding to 8.3 kb indicates integration of one copy of GFP expression cassette into AAVS1 target locus. A band higher than 2kb indicates random integration of one copy of GFP cassette (black stars). Finally, 5.8kb band indicates the presence of integrated head-to-tail vector concatamers. The positions of restriction sites used for analysis are indicated. NTC: non treated cells. Molecular weight marker is indicated on the left.



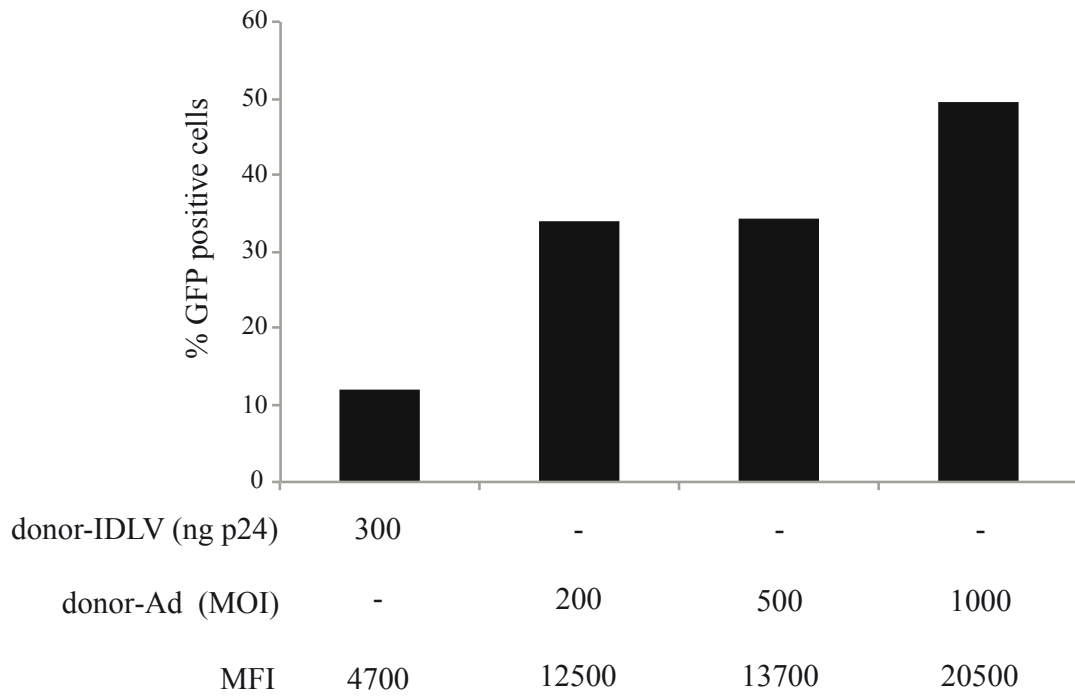

**Supplementary figure 3.** Human primary keratinocytes were infected with the indicated doses of donor IDLV (ng p24) or adenoviral vector serotype 5/50 (multiplicities of infection, MOI) carrying the donor GFP expression cassette. GFP expression was evaluated by FACS analysis 48h after transduction. MFI: mean fluorescence intensity.

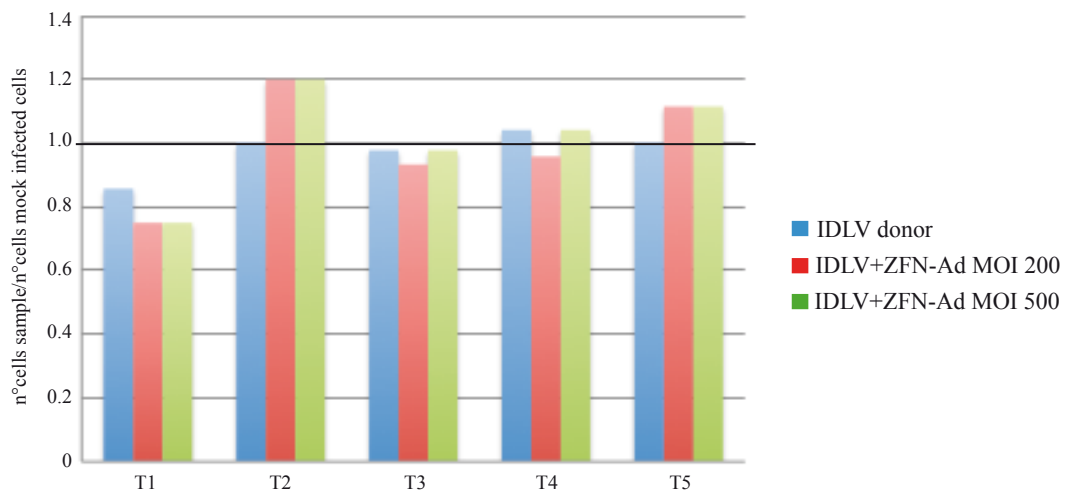

**Supplementary figure 4.** Cell proliferation assay in untreated and treated human primary keratinocytes. The number of cells was determined at each passage after infection (T1-5) in both uninfected and IDLV donor/ZFN-Ad-coinfected cells (MOI 200 and 500). The ratio between the number of cells of each sample and the number of mock infected cells (reference value) is plotted for each cell passages. The black solid line indicates the reference value.

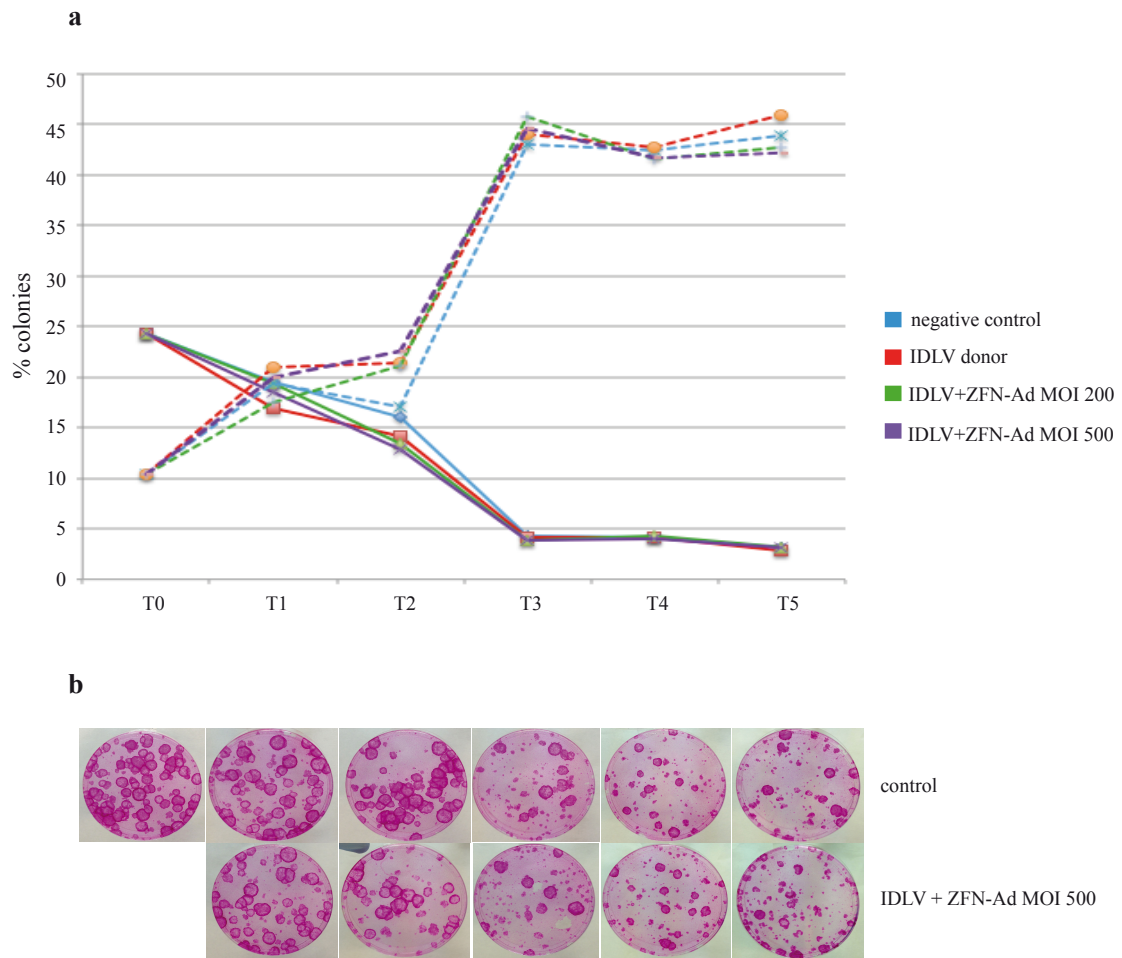

**Supplementary figure 5.** Colony-forming efficiency (CFE) assay in untreated and treated human primary keratinocytes. **a)** Quantitative analysis of growing colonies at passage T0 (infection time) and T1-T5 (post infection) in untreated (negative control) and treated cells. % CFE (solid lines) and % of abortive colonies (dash lines) is calculated as reported in material and method. **b)** Representative images of clonal analysis performed on cells stained with rhodamine B at passage T0 and T1-T5 post infection in control and treated cells.

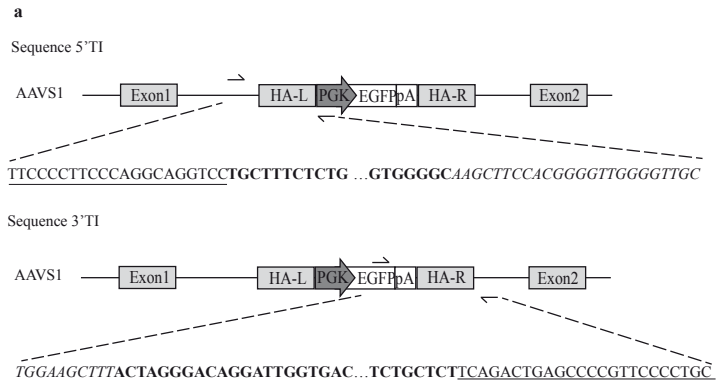

**b**

CCCACTGTTTCCCTTCCAGGCAGGTCCTGCTTTCTCTGACCTGCATTCTCTCCCCTGGGCTGTGCCGCTTTCTGCTGCAGCTTGTGGCTGGGTACCTCTACGGCTGGCCAGATCCTTCCCTGCCCTCCTTCAGGTCCA

TCCTCCTCCACTCCCTCTTCCCCTGCTCTGCTGTGTGTGCTGCCAAGGATGCTTTCGGAGCACTTCTCTCGGGCTGCACCACTGATGCTCTCTGAGCGGATCCTCCCCTGCTCGGGTCCCTCTCCGGGCACTCTCCTCCCTCACCCAAACCCATGCCGTCTTCACTCGTGGGTTCCCTTTTCCCTCTCCTTCTGGGGCTGTGCCATCTCTCGTTTCTTAGGATGGCCTTCTCCGACGGATGCTCCCTTGGCTCCCGCTCCCTTCTTTAGGCTGCATCA

TCACCGTTTTTCTGGACAACCCAAAGTACCCCGTCTCCCTGGCTTAGCCACCTCCATCCTTGTCTTCTTTGCTTGGACACCCGTTCTCCTGTGGATTTCGGGTACCTCTCACTCCTTTCAATTGGGAGCTCCCTACCCCCTTACCTCCTAGTCTGTGCTAGCTCTTCCAGCCCTGTCAATGGCATCTTCTAGGGTCCGAGAGCTCAGCTAGTCTTCTTCTCCCAACCCGGGCCCTATGTCCACTTCAGACAGCATGTTTGTGCTCCAGGATCTGTGTCCCCGAGCTGGGACCACTTATATCCAGGGCCGGTTAATGTGGCTCTTGGTTCTGGGTACTTTTATCTGTCCCTCCACCCCACTGGGGCAAGCTTCCACGGGTTGGGGTT

**c**

CCCACTGTTTCCCTTCCAGGCAGGTCCTGCTTTCTCTGACCTGCATTCTCTCCCCTGGGCTGTGCCGCTTTCTGCTGCAGCTTGTGGCTGGGTACCTCTACGGCTGGCCAGATCCTTCCCTGCCCTCCTTCAGGTCCA

TCCTCCTCCACTCCCTCTTCCCCTGCTCTGCTGTGTGTGCTGCCAAGGATGCTTTCGGAGCACTTCTCTCGGGCTGCACCACTGATGCTCTCTGAGCGGATCCTCCCCTGCTCGGGTCCCTCTCCGGGCACTCTCCTCCCTCACCCAAACCCATGCCGTCTTCACTCGTGGGTTCCCTTTTCCCTCTCCTTCTGGGGCTGTGCCATCTCTCGTTTCTTAGGATGGCCTTCTCCGACGGATGCTCCCTTGGCTCCCGCTCCCTTCTTTAGGCTGCATCA

TCACCGTTTTTCTGGACAACCCAAAGTACCCCGTCTCCCTGGCTTAGCCACCTCCATCCTTGTCTTCTTTGCTTGGACACCCGTTCTCCTGTGGATTTCGGGTACCTCTCACTCCTTTCAATTGGGAGCTCCCTACCCCCTTACCTCCTAGTCTGTGCTAGCTCTTCCAGCCCTGTCAATGGCATCTTCTAGGGTCCGAGAGCTCAGCTAGTCTTCTTCTCCCAACCCGGGCCCTATGTCCACTTCAGACAGCATGTTTGTGCTCCAGGATCTGTGTCCCCGAGCTGGGACCACTTATATCCAGGGCCGGTTAATGTGGCTCTTGGTTCTGGGTACTTTTATCTGTCCCTCCACCCCACTGGGGCAAGCTTCCACGGGTTGGGGTT

**Supplementary figure 6. a)** Sequencing of the amplified 5' and 3' junctions between the transgene cassette and the AAVS1 locus confirmed that ZFN-mediated targeted integration occurred by homologous recombination in sample #3.2 eight weeks after transplantation. **b)** and **c)** sequences of the 5' transgene-junction amplified on #2 and #5 spots. Bold, homology arm; Italic, expression cassette; Underlined, AAVS1 locus.

**Supplementary Table 1.** Comparison between cleavage efficiency (%indels) and percentage of GFP integration in the cell types tested.

| Cell type                          | % indels | % GFP |
|------------------------------------|----------|-------|
| HaCaT cells                        | 29       | 20    |
| immortalized primary keratinocytes | 26       | 12.3  |
| primary keratinocytes              | 9        | 0.3   |

**Supplementary Table 2.** List of primers used for targeted integration analyses.

| <b>Application</b>                                    | <b>Primer ID</b>      | <b>Sequence</b>               | <b>Expected amplicon</b> |
|-------------------------------------------------------|-----------------------|-------------------------------|--------------------------|
| Targeted integration in the AAVS1 locus (5' junction) | TI5 sense             | 5'-CCCCTGTTCCTTCCCTTCCCA-3'   | 0.9kb                    |
|                                                       | TI5 antisense         | 5'-AACCCCAACCCCGTGAAG-3'      |                          |
|                                                       |                       |                               |                          |
| Targeted integration in the AAVS1 locus (3' junction) | TI3 sense             | 5'-CGACAACCACTACCTGAGCA-3'    |                          |
|                                                       | TI3 antisense         | 5'-CTGGGGCCTCTGGGGGAT-3'      | 1.3kb                    |
|                                                       | TI3Ad antisense       | 5'-GACCTGCCTGGAGAAGGAT-3'     | 1.7kb                    |
| Head-to-tail vector concatamers                       | Concatamers sense     | 5'-GCTCGGCTGTTGGGCACTG-3'     | 0.7kb                    |
|                                                       | Concatamers antisense | 5'-CGCACCCATCTCTCTCCTTCTA-3'  |                          |
| Cel-I assay                                           | Cel-I sense           | 5'-CTTGCTTTCTTTGCCTGGAC-3'    | 0.6kb                    |
|                                                       | Cel-I antisense       | 5'-AGGTTCTGGGAGAGGGTAG-3'     |                          |
| Deep sequencing of the AAVS1 locus                    | HS sense              | 5'-GGAGAGAGATGGCTCCAGGAA-3'   | 0.2kb                    |
|                                                       | HS antisense          | 5'-ATGTGGCTCTGGTTCTGGGTACT-3' |                          |
| GFP                                                   | GFP sense             | 5'-TGACCCTGAAGTTCATCTGC-3'    | 0.49kb                   |
|                                                       | GFP antisense         | 5'-GACTGGGTGCTCAGGTAGTG-3'    |                          |
| GAPDH                                                 | GAPDH sense           | 5'-GACCACAGTCCATGCCATCAC-3'   | 0.47kb                   |
|                                                       | GAPDH antisense       | 5'-TCCACCACCCTGTTGCTGTAG-3'   |                          |
